1 **Title:** Drivers of phyllosphere microbial functional diversity in a neotropical forest

2

3 Geneviève Lajoie<sup>1\*</sup>, Rémi Maglione<sup>2</sup>, Steven W. Kembel<sup>3</sup>

4 Département des sciences biologiques, Université du Québec à Montréal

5 141, Avenue du Président-Kennedy, Montréal, Qc, Canada, H2X 1Y4

6

7 Email addresses :

8 <sup>1</sup> genevieve.lajoie1@gmail.com

9 <sup>2</sup> remi.maglione@protonmail.com

10 <sup>3</sup> kembel.steven\_w@uqam.ca

11 \* Corresponding author

12

13

14

15

16

17

## 18 **Abstract**

### 19 *Background*

20           The phyllosphere is an important microbial habitat but our understanding of how plant  
21 hosts drive the composition of their associated leaf microbial communities and whether  
22 taxonomic associations between plants and phyllosphere microbes represent adaptive matching  
23 remains limited. In this study we quantify bacterial functional diversity in the phyllosphere of 17  
24 tree species in a diverse neotropical forest using metagenomic shotgun sequencing. We ask how  
25 hosts drive the functional composition of phyllosphere communities and their turnover across  
26 tree species, using host functional traits and phylogeny. We compare functional predictions  
27 inferred from 16S gene sequencing with functions estimated from metagenomic shotgun  
28 sequencing.

### 29 *Results*

30           Neotropical tree phyllosphere communities are dominated by functions related to the  
31 metabolism of carbohydrates, amino acids and energy acquisition, along with environmental  
32 signalling pathways involved in membrane transport. While most functional variation was  
33 observed within communities, there is non-random assembly of microbial functions across host  
34 species possessing different leaf traits. Metabolic functions related to biosynthesis and  
35 degradation of secondary compounds, along with signal transduction and cell-cell adhesion were  
36 particularly important in driving the match between microbial functions and host traits. These  
37 microbial functions were also evolutionarily conserved across the host phylogeny. Functional  
38 predictions inferred from 16S gene sequences were weakly correlated with functional

39 annotations from the same samples through metagenomic shotgun sequencing, especially for  
40 finer-scale functional annotations.

#### 41 *Conclusions*

42         Functional profiling based on metagenomic shotgun sequencing offers evidence for the  
43 presence of a core functional microbiome across phyllosphere communities of neotropical trees.  
44 While functional turnover across phyllosphere communities is relatively small, the association  
45 between microbial functions and leaf trait gradients among host species supports a significant  
46 role for plant hosts as selective filters on phyllosphere community assembly. This interpretation  
47 is supported by the presence of phylogenetic signal for the microbial traits driving inter-  
48 community variation across the host phylogeny. Our comparison of functional annotations  
49 derived from 16S genes versus metagenomic shotgun sequencing suggests caution in using  
50 functions inferred from 16S genes for studying ecological dynamics in phyllosphere  
51 communities. Taken together, our results suggest that there is adaptive matching between  
52 phyllosphere microbes and their plant hosts.

#### 53 **Keywords**

54 Microbial communities, Phyllosphere, Functional traits, Host-symbiont matching, Metagenomic  
55 shotgun sequencing

56

57

58

59

60

## 61 **Background**

62         The phyllosphere – the aerial surfaces of plants including leaves – is a widespread  
63 microbial habitat that hosts a diversity of microorganisms that play key roles in plant ecology  
64 and evolution [1]. Phyllosphere microbes play key roles in plant health [2, 3] and human health  
65 [4], and can influence ecosystem function [5]. At a broad taxonomic scale, phyllosphere bacterial  
66 communities are consistently dominated by taxa including Actinobacteria, Bacteroidetes,  
67 Firmicutes, and Proteobacteria [6], indicating that plants also influence the composition of their  
68 microbial partners. A key goal of phyllosphere microbial ecology research has been to identify  
69 the adaptive basis of such relationships between plants and associated microbes.

70         Comparative studies of the taxonomic composition of phyllosphere microbial  
71 communities across plant hosts have demonstrated the importance of host identity as a key driver  
72 of variation in phyllosphere microbial taxonomic diversity. At fine taxonomic scales, the  
73 composition of these communities varies predictably across host plant species [7–9] and across  
74 genotypes within host plant species [10, 11]. Plants and associated bacteria also show  
75 cophylogenetic associations, with clades of plants and bacteria consistently occurring together  
76 [9, 12, 13], suggesting close adaptive associations between plants and their phyllosphere  
77 microbes.

78         Determining whether plant-microbe associations in the phyllosphere have an adaptive  
79 basis will require establishing how both plant and microbial functions are related across a range  
80 of host species. Plant functional traits – measures of morphology and physiology that capture key  
81 axes of variation in plant life history and ecology [14] – have been targeted as a potential proxy

82 for explaining microbial community turnover among plant species. These traits determine the  
83 potential for nutrient, metabolite and secondary compound leaching from the plant, which should  
84 largely determine the quality of a leaf as a habitat for phyllosphere microbes [15]. In support of  
85 this hypothesis, plant functional traits such as leaf mass per area, leaf elemental composition, and  
86 growth rate are correlated with phyllosphere microbial community turnover both within [16] and  
87 among plant species [12, 17–20].

88 Several studies have reciprocally identified the broad-scale microbial functional  
89 categories and adaptations that epiphytic microbes possess for living on plants [e.g. 16–19].  
90 Functions including the biosynthesis of osmoprotectants such as trehalose and betaine and the  
91 production of extracellular polysaccharides are enriched in the phyllosphere and are thought to  
92 provide key adaptations to life on leaf surfaces by allowing microbes to attach to the leaf surface  
93 and by providing resistance to environmental stresses and plant defenses [25, 26]. However,  
94 studies of microbial functions in the phyllosphere have largely been based on comparison of one  
95 or a few host plant species. How microbial functions map onto variation in host plant functions  
96 in diverse natural communities thus remains largely unknown. As a result, it is not clear whether  
97 plant microbiomes exhibit the pattern of taxonomic turnover but functional homogeneity across  
98 hosts that has been observed in some animal microbiomes [27] or if a turnover in microbial  
99 functions can also be observed across functionally different tree species.

100 In this study, we quantified the functional repertoire of microbial communities on leaves  
101 of multiple tree species in a neotropical forest in Panama using metagenomic shotgun  
102 sequencing. We asked which microbial functions are abundant in the phyllosphere, and how  
103 these functions are linked to the taxonomy and functional traits of plant hosts. Our central  
104 hypothesis was that the plant-microbe taxonomic associations previously observed in this forest

105 [12, 28] should be driven by adaptive matches between microbes and host plants, leading to  
106 several key predictions. First, we predicted that microbial functions should vary among host  
107 plant species and be correlated with the functional traits of the hosts. Second, we predicted that  
108 cophylogenetic associations between trees and microbes should lead to phylogenetic signal in  
109 microbial functions present on different plant hosts. Third, we predicted that microbial functions  
110 present on leaves should be filtered by the host, since conditions on the leaves of different host  
111 plants create a selection pressure on the functions of microbes able to persist on those leaves.  
112 Given the increasing interest in using metagenomic predictions of functional genes from  
113 metabarcoding data in assessing functional diversity in microbial communities, we lastly aimed  
114 to compare the performance of functional predictions from 16S sequencing performed on the  
115 same samples in retrieving patterns of functional variation observed in our metagenomic shotgun  
116 sequencing dataset [see also 29].

117

## 118 **Results**

### 119 *Metagenomic shotgun sequencing characterization of phyllosphere microbial functions*

120 Overall, we detected 4587 different functional genes across all samples based on  
121 annotation of metagenomic shotgun sequencing of tropical tree phyllosphere communities.  
122 Functions related to metabolism were the most abundant overall in our dataset, making up 45%  
123 of all functionally annotated sequences (Fig. 1). The principal metabolic functions in the  
124 phyllosphere were related to metabolism of amino acids (e.g. amino acid related enzymes),  
125 nucleotides (e.g. purine and pyrimidine metabolism), carbohydrates (e.g. pyruvate, glyoxylate  
126 and dicarboxylate metabolism), and energy (e.g. oxidative phosphorylation & TCA cycle) (Fig.

127 1). Groups of functional genes related to environmental and genetic information processing also  
128 had a high relative abundance, mainly membrane transport (e.g. transporters), translation (e.g.  
129 aminoacyl-tRNA biosynthesis), and signal transduction (e.g. two-component systems).

### 130 *Variation in phyllosphere functions and taxa among versus within samples*

131 The bacterial functions present on tree leaves were remarkably consistent among  
132 different samples. The vast majority of functional variation occurred within samples (>97%),  
133 with a very small contribution of functional turnover among samples (<3%) to total functional  
134 diversity, regardless of the functional level under study. Most taxonomic diversity was also  
135 observed within samples, with a contribution of beta-diversity increasing from 1 to 4.4% of total  
136 diversity with a refinement of the taxonomic scale utilized (Table 1). The principal component  
137 analysis of bacterial community functional composition indicated that metabolic functions  
138 related to biosynthesis and degradation of secondary compounds and antibiotics, as well as  
139 functions related to signal transduction and cell-cell adhesion were the most strongly varying  
140 among hosts (Fig. 2; Supp. Tab. 1, Additional File 1). We detected 17 Tier 3 functions that  
141 exhibited a significantly non-random phylogenetic signal with respect to the host phylogeny  
142 ( $P < 0.05$ ; Fig. 3). These functions were mostly involved in the metabolism of terpenoids and  
143 polyketides, signal transduction and cellular processes.

### 144 *Associations between microbial and plant traits and host filtering*

145 Many of the plant traits displayed some level of correlation with the principal axes of  
146 microbial functional community composition. Among these, morphological leaf traits (e.g. leaf  
147 area, leaf mass per area) were most strongly associated with the first two axes of microbial  
148 functional variation. Leaf elemental concentrations of copper, aluminum and manganese were

149 also strongly correlated with these first dimensions. The plant trait gradients explained altogether  
150 ~17% of variation in functional composition among microbial communities. Around half of the  
151 microbial Tier 3 functions were significantly more abundant or less abundant than expected by  
152 chance in their community, based on a null model keeping both the total abundance of a trait and  
153 the number of traits in a community constant (Table 2). The filtering signal was slightly stronger  
154 for the microbial taxa than for the microbial functions (Table 2).

### 155 *Comparison of functional annotations based on metagenomic shotgun versus 16S sequencing*

156 Prediction of the functional content of phyllosphere microbial communities from their  
157 16S rRNA genes using Tax4Fun yielded a higher diversity of functional genes (6429 genes)  
158 across all samples compared to predictions from direct annotation of metagenomic shotgun  
159 sequence data for the same samples (4587 genes). Most (~95%) functional genes were detected  
160 in both the metagenomic and 16S datasets. The relative abundances of individual genes covaried  
161 between the two datasets, with an increasing coherence of functional annotations at broader  
162 levels of functional classification (Fig. 4). When testing correlation between metagenomic and  
163 16S annotations within Tier 2 functional categories, we observed generally strong associations  
164 (median  $R^2 = 0.85$ ) between relative abundances of functions in the two datasets, though the  
165 slope of the relationship was often deviant from the 1:1 line (Supp. Fig. 1, Additional File 2). A  
166 constrained analysis of principal coordinates analysis revealed that genes related to  
167 environmental information processing functions, especially membrane transport and signal  
168 transduction, as well as functions related to cellular processes such as bacterial motility proteins  
169 and quorum sensing were especially more represented in the 16S dataset, while metabolism  
170 functions including nucleotide metabolism and energy metabolism as well as genetic information  
171 processing functions (transcription and translation) were more represented in the metagenomic



172 dataset (Supp. Tab. 2, Additional File 1). The type of functional prediction used had an influence  
173 on the classification of samples in ordination space. While the classification of samples was  
174 consistent among functional levels for each analysis separately, ordinations were incoherent  
175 between datasets at all levels ( $m^2$  similar to that expected by chance) (Supp. Fig. 2, Additional  
176 File 2).

## 177 **Discussion**

178         The functional composition of tree phyllosphere microbial communities in a tropical  
179 forest in Panama is largely consistent with those reported in the literature, regardless of the type  
180 of plant studied, suggesting the presence of a core functional microbiome in phyllosphere  
181 microbial systems. Core functional microbiomes in host-associated systems have also been  
182 reported for other hosts. Our study supports findings of an important role for the metabolism of  
183 carbohydrates and amino acids in bacterial survival in the phyllosphere [18, 46, 47] that is  
184 consistent with the abundance of these compounds in leaf leachates and photosynthates. The  
185 main mechanism of energy acquisition from these compounds appeared to be the TCA (citric  
186 acid) cycle, as reported in experimental studies of bacterial colonization of the phyllosphere [47].  
187 Membrane transporters were also reported to be an important component of the epiphytic  
188 microbe functional repertoire, maximising the ability to monopolize otherwise limiting resources  
189 [48]. The abundance of signal transduction functional pathways, involved in the rapid sensing  
190 and response to environmental change, would lastly be coherent with the high variability in  
191 conditions of humidity, light and temperature in that microbial habitat [25].

192         The low functional variability in microbiomes observed among tree species represents a  
193 further line of evidence supporting the presence of a core phyllosphere functional microbiome.

194 This low variability, observed even at fine functional levels, could be the consequence of  
195 essentially similar constraints imposed by the generally harsh leaf environment on its microbial  
196 communities, regardless of the specific physiological traits of the host plant species. This low  
197 functional turnover among communities was also associated with a low taxonomic turnover,  
198 contrasting with reports from phyllosphere-associated temperate systems where species identity  
199 was a strong driver of taxonomic composition of the microbial communities [8]. These results  
200 could be explained by a finer-scale partitioning of taxa among neotropical than temperate tree  
201 species, or a greater overlap in species functional types limiting strong associations between  
202 microbial taxa and their hosts. Such differences should be further investigated.

203         Despite the high levels of convergence in microbial functions among the phyllospheres of  
204 different tree species, several lines of evidence support a role for plant species taxonomic and  
205 functional identity in driving microbial community assembly. Tree traits explained a notable  
206 portion of the functional turnover among microbial communities. Traits correlated with  
207 microbial functional turnover (e.g. leaf area, leaf mass per area) are mostly part of the leaf  
208 economics spectrum [49], a functional strategy scheme describing photosynthetic resource-use  
209 efficiency in plants, which is coherent with what we know of phyllosphere microbial physiology.  
210 The ability of a tree to be conservative of its resources and generate thicker and better protected  
211 leaves (i.e. high leaf mass per area) is likely to limit the leaching of nutrients from the leaf to the  
212 phyllosphere, in turn constituting a filter on resource-use strategies in microbes. The high  
213 correlation of leaf mass per area with turnover in microbial communities is coherent with a  
214 previously described role for cuticle characteristics in determining functional turnover among  
215 leaf microbial communities [16, 20]. The high correlation of aluminum and copper  
216 concentrations in leaves with microbial functional variation may be explained by their role as

217 antibiotics. The predominance of two-component systems associated with high aluminum and  
218 copper concentrations suggests that the ability to sense and quickly respond to fluxes in these  
219 elements at the cell surface might constitute an efficient stress-response to deal with these  
220 conditions [50]. This type of plant trait gradient is analog to the leaf chemical gradient described  
221 by Yadav and colleagues [51], who reported variation in leaf colonization by phyllosphere  
222 microbes on different tree species as a function of their total leaf phenolics content. Taken  
223 together, these interpretations are concordant with the importance of energy metabolism,  
224 secondary metabolites and antibiotics production as well as environmental sensing in driving  
225 functional turnover of microbes among tree species.

226         Other lines of evidence support the idea that the plant host plays a selective role on  
227 microbial community assembly, such as the detection of bacterial traits that are non-randomly  
228 structured in the plant phylogeny. While this pattern might arise from the filtering of microbes on  
229 phylogenetically structured selective plant traits or from co-evolution of the two partners, it is  
230 regardless indicative of an influence of the host on the functional make-up of bacterial  
231 phyllosphere communities. Interestingly, the set of pathways that are important in driving  
232 functional turnover among communities belong to the same functional categories as the ones that  
233 are phylogenetically structured among plant hosts, supporting the proposed match between these  
234 bacterial functions and their host's functional and taxonomic identity. The fact that the relative  
235 abundance of a large set of functions was different within communities than that expected by  
236 chance given their relative abundance across samples, also supports a role for individual tree  
237 species in structuring the functional composition of their phyllosphere bacterial communities.  
238 The higher filtering of most microbial taxa relative to microbial functions suggests a role for  
239 unmeasured trait variation in driving functional turnover among communities.

240           The relatively small but significant contribution of functional turnover among microbial  
241 communities to the total functional diversity observed across samples suggests that the functions  
242 that are of importance in driving the distribution of bacteria across different host trees are  
243 actually relatively few compared to those enabling the bacteria to pass the overall “phyllosphere  
244 filter” that is needed to survive in the phyllosphere habitat. It remains unknown whether the  
245 majority of functional pathways that do not vary among trees are actually important for the  
246 ecology of the microbes, or if that trait variation is adaptively neutral within communities. It is  
247 also possible that some pathways important for microbial adaptations to leaf physiological  
248 gradients are not yet functionally described and are part of the large number of sequences that  
249 could not be functionally annotated. Ongoing efforts to better characterize gene functions will  
250 help improve the precision of ecological inferences in environmental metagenomes.

251           The functional predictions generated from annotation of inferred functions from 16S  
252 sequences were broadly comparable to those obtained through shotgun metagenomic sequencing  
253 at broad functional levels (e.g. Tier 2 functions), but at finer levels (Tier 3 and functional genes)  
254 there were numerous discrepancies in the relative abundance of functions inferred using these  
255 different approaches. The categories of functions for which we observed the largest  
256 discrepancies between the two approaches to functional annotations overlapped with those  
257 described for aquatic bacterial communities by Staley and colleagues [29] (i.e. membrane  
258 transport, translation). These results point to consistent biases in predictions of metagenomic  
259 functions from 16S sequences across ecosystems and warrant caution in interpreting ecological  
260 dynamics from inferred functions, especially when Tier 3 or functional gene abundances are  
261 being inferred.

262

## 263 **Conclusions**

264           In conclusion, we have identified a core functional microbiome in the phyllosphere of  
265 neotropical trees. While most functional variation was observed within individual microbial  
266 communities, we reveal a functional matching between the traits of microbes and the traits of  
267 plants across 17 tree species, emphasizing the role for energy metabolism, secondary metabolites  
268 and antibiotic production as well as environmental sensing in mediating bacterial adaptation to  
269 leaf trait gradients in the canopy. Our identification of the adaptive drivers of phyllosphere  
270 microbial community composition in this neotropical ecosystem represents a good starting point  
271 for identifying the types of microbial traits that could be routinely studied by phyllosphere  
272 microbial ecologists to address global questions on the ecological and evolutionary dynamics of  
273 phyllosphere microbes. Empirical testing of the fitness consequences of variation in those traits  
274 will represent an important next step in understanding adaptive processes in the phyllosphere.

275

## 276 **Methods**

### 277 *Microbial DNA collection, extraction and sequencing*

278           Microbial communities were collected from the leaves of 24 individual trees from 17 tree  
279 species (1-2 samples per species) in the tropical lowland rainforest of Barro Colorado Island,  
280 Panama, in December 2010. These samples were selected from a larger pool of samples [12, 28]  
281 for which we had sufficient quantities of high-quality DNA, selecting host species to maximize  
282 the phylogenetic and functional diversity of hosts. Methodological details of sample collection  
283 are described by Kembel et al. 2014 [12]. Briefly, 50-100g of fresh leaves were collected from  
284 the subcanopy of one tree of each species. Microbial cells were then washed from each leaf

285 sample using phosphate buffer [1 M Tris•HCl, 0.5 M Na EDTA, and 1.2% CTAB] and collected  
286 by centrifuging at  $4,000 \times g$  for 20 min. DNA was extracted using MoBio PowerSoil DNA  
287 extraction kits and samples stored at  $-80^{\circ}\text{C}$  for future analyses. We quantified DNA  
288 concentrations and sequenced both extraction negative controls and PCR negative controls for  
289 these samples as part of previously published analyses of bacterial 16S and fungal 28S amplicon  
290 sequencing of these samples [12, 28]; none of the negative control samples contained measurable  
291 concentrations of DNA and upon sequencing they contained fewer DNA sequences than the  
292 minimum cut-off for inclusion in analyses. As a result, they were all excluded from subsequent  
293 analyses in previously published studies and the present study. To quantify the metagenomic  
294 structure of each microbial community, we constructed a paired-end metagenomic shotgun  
295 library including a random sample of the whole community DNA composition using an Illumina  
296 Nextera XT® kit (Illumina reference FC-131-1024). These libraries were then sequenced using  
297 Illumina MiSeq paired-end 2 x 250 base pair sequencing (V2 kit, Illumina reference MS-102-  
298 2003). Analyses were performed on these 24 samples unless stated otherwise. Results were not  
299 influenced by including replicates of the same species (see tests below).

### 300 *Microbial taxonomy and functional trait annotation*

301 Metagenomic shotgun sequencing yielded 14,642,408 reads in total. We trimmed  
302 sequences to remove Illumina adapters and truncate end-bases with a quality score less than 20,  
303 and removed sequences shorter than 25bp, leaving 14,634,072 trimmed and quality-controlled  
304 reads. Taxonomic annotation of all sequences in each microbial community was performed to  
305 restrict functional analyses only to bacterial sequences. We annotated metagenomic reads using  
306 Kaiju, which annotates taxonomic identity of reads by comparing sequenced reads to the  
307 microbial subset of the NCBI BLAST non-redundant protein database [30]. Out of the 7,317,036

308 sequences, we were able to annotate taxonomy to at least the taxonomic level of kingdom for  
309 2,138,885 sequences, of which 2,100,491 sequences were from Bacteria, representing 29% of  
310 total sequences. Of these Bacterial sequences, 1,902,749 were annotated to at least the phylum  
311 level, representing 26% of total sequences. Analysis of taxonomic composition was carried out  
312 on this subset of sequences annotated to at least the bacterial Phylum level. We rarefied all  
313 samples to 20,100 randomly chosen sequences per sample for taxonomic composition analyses,  
314 resulting in a total of 482,400 sequences for taxonomic analyses.

315 Functional annotation of microbial sequences was performed via protein homology  
316 searches using the KEGG annotation framework [31, 32] via the software COGNIZER [33].  
317 Analyses resulted in the identification of functional genes and categories for 873,082 sequences  
318 representing 12% of sequences. In total, of the 7,317,036 bacterial sequences that were obtained  
319 from the metagenomic sequencing of all samples, 722,936 sequences were taxonomically  
320 annotated as bacteria and had a functional annotation. We lastly classified each of these  
321 sequences into functional categories, defined by the BRITE functional hierarchy manually  
322 curated for the KEGG annotation system based on published literature [32]. This hierarchy  
323 contains four different levels, which were designed as Tier 1, Tier 2, Tier 3 and functional genes,  
324 ranging from the more general to the more specific functional assignment (see [29]). Most  
325 analyses were performed at the Tier 3 level, in the intent of reaching a balance between the  
326 complexity of the data and its interpretability. In a few instances, Tier 3 categories were perfectly  
327 correlated across samples so we removed the duplicates from the dataset (Supp. Tab. 3,  
328 Additional File 1).

329 *Inference of microbial functions from 16S gene sequences*

330           Several methods have been proposed to estimate the functional composition of microbial  
331 communities based on estimation of functions from 16S gene sequences [e.g. 25–27]. In order to  
332 compare estimates of functional composition based on direct sequencing and annotation of  
333 metagenomic shotgun sequencing data versus estimation of functions based on 16S sequences,  
334 we analyzed previously published 16S gene sequence data for each sample [12]. The randomly  
335 rarefied set of 4000 16S sequences per sample described by Kembel et al. [12] were analyzed  
336 using Tax4Fun [35] which provided an inferred estimate of the relative abundance of microbial  
337 functions in each sample.

### 338 *Plant functional traits and phylogeny*

339           We obtained measurements of plant functional traits for all plant species from a dataset  
340 collected previously on Barro Colorado Island [37]. This trait database initially included 21  
341 whole-plant and leaf traits, but we reduced these traits to a subset of 12 traits with limited  
342 overlap in functional significance [38]. This reduced set of traits included height at maturity,  
343 sapling growth rate and sapling mortality rate as whole-plant resource-use traits, leaf area and  
344 leaf dry matter content as leaf structural traits, and a suite of leaf elemental chemistry traits  
345 including concentration of aluminum, calcium, copper, magnesium, phosphorus, zinc and  
346 nitrogen content. A phylogenetic hypothesis for host plant species was obtained by grafting tree  
347 species onto a dated megatree of angiosperms provided by Zanne et al. [39] using Phylomatic v.3  
348 [40].

### 349 *Variation in phyllosphere functions among versus within samples*

350           We determined the contributions of within- and among-sample variation in function of  
351 total functional variation among metagenomic samples using additive diversity partitioning



352 implemented in the R package entropart [41]. The proportions of alpha and beta diversity were  
353 calculated as a ration of the portion of alpha (or beta) diversity on total diversity. Analyses were  
354 performed at three levels of functional aggregation (Tier 1 to Tier 3). We tested whether the  
355 presence of two samples rather than one for some of the sampled species would affect this  
356 diversity partitioning by subsampling the dataset to include all possible combinations of samples  
357 totally a single sample per species (n=128) and rerunning the analyses. This subsampling did not  
358 affect our results (Supp. Fig. 3, Additional File 2), such that we kept the 24 samples in the  
359 subsequent analyses. We then compared sources of turnover for functions and taxonomy  
360 between samples by performing the same analysis from the taxonomically annotated  
361 metagenomic sequences, defined at levels from phylum to species.

#### 362 *Associations between microbial and plant traits*

363 We performed a principal component analysis (PCA) of functional trait matrices and  
364 identified the functions contributing most to variation along the first axes of variation using R  
365 package FactoMineR [42]. We fitted the plant traits onto this ordination to identify correlations  
366 between bacterial traits driving the PCA and the plant traits. We evaluated the influence of tree  
367 species replicates in our samples on these results and did not uncover important differences in  
368 the main drivers of functional differences among samples when excluding these duplicates such  
369 that all 24 samples were kept in this analysis.

370 We quantified the phylogenetic signal in associations between microbial functions and  
371 host plant phylogeny using function *multiphylosignal* from R package Picante [43] to calculate  
372 Blomberg's K and an associated P-value, which quantifies whether a microbial function exhibits  
373 stronger phylogenetic signal than expected by chance. We selected a single random sample per

374 host species for those host species with more than one sample prior to calculating phylogenetic  
375 signal. We repeated this for different random subsamples and it did not qualitatively change the  
376 results so we report phylogenetic signal for a representative random subsample.

### 377 *Host filtering of microbial functions and taxa*

378         The degree of host filtering on microbial communities was assessed by comparing the  
379 occurrence of traits in observed communities to those obtained from 999 randomizations of  
380 community trait matrices. Host filtering was detected as an over- or under-representation of the  
381 given trait in individual communities. Randomizations were generated by permutations of the  
382 trait matrix preserving row and column totals. For each site and bacterial trait combination, we  
383 compare the observed frequency of the trait to the random values to assess whether it was lower  
384 or higher than expected by chance. To compare the strength of functional vs. taxonomic filtering,  
385 we applied the same procedure to the taxonomic datasets defined at each of six taxonomic levels,  
386 from the phylum to the species.

### 387 *Comparison of functional annotations based on shotgun metagenomic versus 16S sequencing*

388         We compared functional annotations obtained through shotgun metagenomic sequencing  
389 with those obtained from functional predictions made from 16S sequencing on the same samples.  
390 Since one sample was an outlier in the 16S functional predictions so we removed it in both  
391 datasets prior to analyses, resulting in 23 samples total.

392         We first compared the relative abundances of individual functional pathways across the  
393 two datasets by performing a correlation analysis between their average abundance across all  
394 samples. The functional pathways the furthest from the 1:1 relationship would be the most over-  
395 or under- represented in either method. We then determined the functional pathways which were

396 the most important in differentiating between the metagenomic and the 16S functional  
397 annotations by performing a Constrained Analysis of Principal Coordinates (CAP) analysis on  
398 Bray-Curtis distances. We next tested whether such differences would have an importance in the  
399 ecological classification of samples by performing a Procrustes analysis on the functional tables  
400 of each dataset [44], and tested the degree of similarity in the relationships among sites  
401 calculated for each dataset using a permutation approach. The degree of similarity is described  
402 by the  $m^2$  term, representing the sum of the squared deviations between sample positions in one  
403 dataset vs. the other. A  $m^2$  statistic smaller than expected by chance indicates that the two  
404 datasets are more similar than expected by chance [45]. Finally, we generated a diversity  
405 partitioning of the 16S functional predictions as described above for the metagenomic functional  
406 annotations to determine the impact of the 16S prediction approach in the description of  
407 biodiversity within and across samples.

408

## 409 **Declarations**

410 *Ethics approval and consent to participate*

411 Not applicable.

412 *Consent for publication*

413 Not applicable.

414 *Availability of data and material*

415 The datasets generated and/or analysed during the current study are available in a MG-RAST  
416 repository: <https://www.mg-rast.org/linkin.cgi?project=mgp91848>

417 The scripts used to perform analyses for the current study are available in a GitHub repository:  
418 [https://github.com/glajoie1/panama\\_metagenome](https://github.com/glajoie1/panama_metagenome)

#### 419 *Competing interests*

420 The authors declare that they have no competing interests.

#### 421 *Funding*

422 Alexander Graham Bell Canada Graduate Scholarship (GL), Canada Research Chair (SK),  
423 NSERC DG (SK), CTFS/STRI (SK), FRQNT (SK).

#### 424 *Authors' contributions*

425 GL and SK conceptualized the study. SK collected the data. RM and SK curated the data. GL  
426 and SK analyzed the data and wrote the manuscript. All authors revised and accepted the final  
427 manuscript.

#### 428 *Acknowledgements*

429 We thank Travis Dawson and Luis Tovar for assistance with sample processing and sequencing.

430

431 **References**

- 432 1. Vorholt JA. Microbial life in the phyllosphere. *Nat Rev Microbiol* 2012; **10**: 828–840.
- 433 2. Wagi S, Ahmed A. Phyllospheric plant growth promoting bacteria. *J Bacteriol Mycol*  
434 2017; **5**: 215–216.
- 435 3. Saleem M, Meckes N, Pervaiz ZH, Traw MB, Saleem M, Saleem M. Microbial  
436 interactions in the phyllosphere increase plant performance under herbivore biotic stress.  
437 *Front Microbiol* 2017; **8**: 41.
- 438 4. Berg G, Grube M, Schlöter M, Smalla K. The plant microbiome and its importance for  
439 plant and human health. *Front Microbiol* 2014; **5**: 491.
- 440 5. Laforest-Lapointe I, Paquette A, Messier C, Kembel S. Leaf bacterial diversity mediates  
441 plant diversity and ecosystem function relationships. *Nature* 2017; **546**: 145–147.
- 442 6. Bulgarelli D, Al. E. Structure and functions of the bacterial microbiota of plants. *Annu Rev*  
443 *Plant Biol* 2013; **64**: 807–838.
- 444 7. Lambais MR, Lucheta AR, Crowley DE. Bacterial community assemblages associated  
445 with the phyllosphere, dermosphere, and rhizosphere of tree species of the Atlantic forest  
446 are host taxon dependent. *Microb Ecol* 2014; **68**: 567–574.
- 447 8. Laforest-Lapointe I, Messier C, Kembel SW. Host species identity, site and time drive  
448 temperate tree phyllosphere bacterial community structure. *Microbiome* 2016; **4**: 27.
- 449 9. Kim M, Singh D, Lai-hoe A, Chun J, Adams JM. Distinctive phyllosphere bacterial  
450 communities in tropical trees. *Microb Ecol* 2012; **63**: 674–681.
- 451 10. Bailey JK, Deckert R, Schweitzer JA, Rehill BJ, Lindroth RL, Gehring C, et al. Host plant

- 452 genetics affects hidden ecological players: links among *Populus*, condensed tannins, and  
453 fungal endophyte infection. *Can J Bot* 2005; **83**: 356–361.
- 454 11. Schweitzer JA, Bailey JK, Fischer DG, LeRoy CJ, Lonsdorf E V., Whitham TG, et al.  
455 Plant-soil microorganism interactions: heritable relationship between plant genotype and  
456 microorganisms. *Ecology* 2008; **89**: 773–781.
- 457 12. Kembel SW, O'Connor TK, Arnold HK, Hubbell SP, Wright SJ, Green JL. Relationships  
458 between phyllosphere bacterial communities and plant functional traits in a neotropical  
459 forest. *Proc Natl Acad Sci* 2014; **111**: 13715–20.
- 460 13. Redford AJ, Bowers RM, Knight R, Linhart Y, Fierer N. The ecology of the phyllosphere:  
461 geographic and phylogenetic variability in the distribution of bacteria on tree leaves.  
462 *Environ Microbiol* 2010; **12**: 2885–2893.
- 463 14. Violle C, Navas M, Vile D, Kazakou E, Fortunel C, Hummel I, et al. Let the concept of  
464 trait be functional! *Oikos* 2007; **116**: 882–892.
- 465 15. van der Wal A, Leveau JHJ. Modelling sugar diffusion across plant leaf cuticles: the  
466 effect of free water on substrate availability to phyllosphere bacteria. *Environ Microbiol*  
467 2011; **13**: 792–797.
- 468 16. Hunter PJ, Hand P, Pink D, Whipps JM, Bending GD. Both leaf properties and microbe-  
469 microbe interactions influence within-species variation in bacterial population diversity  
470 and structure in the lettuce (*Lactuca* species) phyllosphere. *Appl Environ Microbiol* 2010;  
471 **76**: 8117–8125.
- 472 17. Whipps JM, Hand P, Pink D, Bending GD. Phyllosphere microbiology with special  
473 reference to diversity and plant genotype. *J Appl Microbiol* 2008; **105**: 1744–1755.

- 474 18. Yadav RKP, Papatheodorou EM, Karamanoli K, Constantinidou HIA, Vokou D.  
475 Abundance and diversity of the phyllosphere bacterial communities of Mediterranean  
476 perennial plants that differ in leaf chemistry. *Chemoecology* 2008; **18**: 217–226.
- 477 19. Barott KL, Rodriguez-Brito B, Janouškovec J, Marhaver KL, Smith JE, Keeling P, et al.  
478 Microbial diversity associated with four functional groups of benthic reef algae and the  
479 reef-building coral *Montastraea annularis*. *Environ Microbiol* 2011; **13**: 1192–1204.
- 480 20. Bodenhausen N, Bortfeld-Miller M, Ackermann M, Vorholt JA. A synthetic community  
481 approach reveals plant genotypes affecting the phyllosphere microbiota. *PLoS Genet*  
482 2014; **10**: e1004283.
- 483 21. Akinsanya MA, Goh JK, Lim SP, Ting ASY. Metagenomics study of endophytic bacteria  
484 in *Aloe vera* using next-generation technology. *Genomics Data* 2015; **6**: 159–163.
- 485 22. Finkel OM, Delmont TO, Post AF, Belkin S. Metagenomic signatures of bacterial  
486 adaptation to life in the phyllosphere of a salt-secreting desert tree. *Appl Environ*  
487 *Microbiol* 2016; **82**: 2854–2861.
- 488 23. Sambles C, Moore K, Lux TM, Jones K, Littlejohn GR, Gouveia JD, et al. Metagenomic  
489 analysis of the complex microbial consortium associated with cultures of the oil-rich alga  
490 *Botryococcus braunii*. *Microbiologyopen* 2017; **6**: 1–9.
- 491 24. Krohn-Molt I, Wemheuer B, Alawi M, Poehlein A, Güllert S, Schmeisser C, et al.  
492 Metagenome survey of a multispecies and alga-associated biofilm revealed key elements  
493 of bacterial-algal interactions in photobioreactors. *Appl Environ Microbiol* 2013; **79**:  
494 6196–6206.
- 495 25. Rastogi G, Coaker GL, Leveau JHJ. New insights into the structure and function of

- 496 phyllosphere microbiota through high-throughput molecular approaches. *FEMS Microbiol*  
497 *Lett* 2013; **348**: 1–10.
- 498 26. Hartmann A, Schmid M, van Tuinen D, Berg G. Plant-driven selection of microbes. *Plant*  
499 *Soil* 2009; **321**: 235–257.
- 500 27. Human T, Project M. Structure, function and diversity of the healthy human microbiome.  
501 *Nature* 2012; **486**: 207–214.
- 502 28. Kembel S, Mueller R. Plant traits and taxonomy drive host associations in tropical  
503 phyllosphere fungal communities. *Botany* 2014; **92**: 303–311.
- 504 29. Staley C, Gould TJ, Wang P, Phillips J, Cotner JB, Sadowsky MJ. Core functional traits of  
505 bacterial communities in the Upper Mississippi River show limited variation in response  
506 to land cover. *Front Microbiol* 2014; **5**: 414.
- 507 30. Menzel P, Ng KL, Krogh A. Fast and sensitive taxonomic classification for metagenomics  
508 with Kaiju. *Nat Commun* 2016; **7**: 11257.
- 509 31. Ogata H, Goto S, Sato K, Fujibuchi W, Bono H, Kanehisa M. KEGG: Kyoto encyclopedia  
510 of genes and genomes. *Nucleic Acids Res* 1999; **27**: 29–34.
- 511 32. Kanehisa M, Goto S, Sato Y, Kawashima M, Furumichi M, Tanabe M. Data, information,  
512 knowledge and principle: Back to metabolism in KEGG. *Nucleic Acids Res* 2014; **42**:  
513 199–205.
- 514 33. Bose T, Haque MM, Reddy C, Mande SS. COGNIZER: A framework for functional  
515 annotation of metagenomic datasets. *PLoS One* 2015; **10**: e0142102.
- 516 34. Langille M, Zaneveld J, Caporaso JG, McDonald D, Knights D, Reyes J, et al. Predictive  
517 functional profiling of microbial communities using 16S rRNA marker gene sequences.



- 518 *Nat Biotechnol* 2013; **31**: 814–21.
- 519 35. Aßhauer KP, Wemheuer B, Daniel R, Meinicke P. Tax4Fun: Predicting functional profiles  
520 from metagenomic 16S rRNA data. *Bioinformatics* 2015; **31**: 2882–2884.
- 521 36. Iwai S, Weinmaier T, Schmidt BL, Albertson DG, Poloso NJ, Dabbagh K, et al. Piphillin:  
522 Improved prediction of metagenomic content by direct inference from human  
523 microbiomes. *PLoS One* 2016; **11**: 1–18.
- 524 37. Wright SJ, Kitajima K, Kraft NJB, Reich PB, Wright IJ, Bunker DE, et al. Functional  
525 traits and the growth-mortality trade-off in tropical trees. *Ecology* 2010; **91**: 3664–3674.
- 526 38. Pérez-Harguindeguy N, Diaz S, Garnier E, Lavorel S, Poorter H, Jaureguiberry P, et al.  
527 New handbook for standardized measurement of plant functional traits worldwide. *Aust J*  
528 *Bot* 2013; **61**: 167–234.
- 529 39. Zanne AE, Tank DC, Cornwell WK, Eastman JM, Smith SA, FitzJohn RG, et al. Three  
530 keys to the radiation of angiosperms into freezing environments. *Nature* 2014; **506**: 89–  
531 92.
- 532 40. Webb CO, Donoghue MJ. Phylomatic: tree assembly for applied phylogenetics. *Mol*  
533 *Ecol Notes* 2005; **5**: 181–183.
- 534 41. Marcon E, Hérault B. entropart: An R Package to Measure and Partition Diversity. *J*  
535 *Stat Softw* 2015; **67**: 1–26.
- 536 42. Lê S, Josse J, Husson F. FactoMineR: An R package for multivariate analysis. *J Stat Softw*  
537 2008; **25**: 1–18.
- 538 43. Kembel SW, Cowan PD, Helmus MR, Cornwell WK, Morlon H, Ackerly DD, et al.  
539 Picante: R tools for integrating phylogenies and ecology. *Bioinformatics* 2010; **26**: 1463–

- 540 1464.
- 541 44. Oksanen AJ, Blanchet FG, Friendly M, Kindt R, Legendre P, Mcglinn D, et al. Package ‘  
542 vegan’. 2013.
- 543 45. Jackson DA. PROTEST: A PROcrustacean Randomization TEST of community  
544 environment concordance. *Ecoscience* 1995; **2**: 297–303.
- 545 46. Ryffel F, Helfrich EJ, Kiefer P, Peyriga L, Portais J, Piel J, et al. Metabolic footprint of  
546 epiphytic bacteria on *Arabidopsis thaliana* leaves. *ISME J* 2015; 1–12.
- 547 47. Müller DB, Schubert OT, Röst H, Aebersold R, Vorholt JA. Systems-level proteomics of  
548 two ubiquitous leaf commensals reveals complementary adaptive traits for phyllosphere  
549 colonization. *Mol Cell Proteomics* 2016; **15**: 3256–3269.
- 550 48. Delmotte N, Knief C, Chaffron S, Innerebner G, Roschitzki B, Schlapbach R, et al.  
551 Community proteogenomics reveals insights into the physiology of phyllosphere bacteria.  
552 *Proc Natl Acad Sci U S A* 2009; **106**: 16428–16433.
- 553 49. Wright IJ, Reich PB, Westoby M, Ackerly DD, Baruch Z, Bongers F, et al. The  
554 worldwide leaf economics spectrum. *Nature* 2004; **428**: 821–827.
- 555 50. Kaczmarczyk A, Hochstrasser R, Vorholt JA, Francez-Charlot A. Complex two-  
556 component signaling regulates the general stress response in Alphaproteobacteria. *Proc*  
557 *Natl Acad Sci U S A* 2014; **111**: E5196–E5204.
- 558 51. Yadav RKP, Karamanoli K, Vokou D. Bacterial colonization of the phyllosphere of  
559 mediterranean perennial species as influenced by leaf structural and chemical features.  
560 *Microb Ecol* 2005; **50**: 185–196.

561

562 **Additional Files**

563 **Additional File 1 (.docx)**

564 Supplementary Tables. This additional file contains 3 supplementary tables, referred to in the  
565 main text.

566 **Additional File 2 (.docx)**

567 Supplementary Figures. This additional file contains 3 supplementary figures, referred to in the  
568 main text.

569 **Additional File 3 (.newick)**

570 Host phylogeny. A phylogenetic hypothesis for host plant species obtained by grafting tree  
571 species from the study site onto a dated megatree of angiosperms (see Methods for details).

572 **Tables**

573 **Table 1.** Functional and taxonomic additive diversity partitioning of bacterial communities across 24 tree phyllosphere samples.

|                     | Functional  |        |                 |        |        |                 | Taxonomic |       |       |        |       |         |
|---------------------|-------------|--------|-----------------|--------|--------|-----------------|-----------|-------|-------|--------|-------|---------|
|                     | Metagenomic |        |                 | 16S    |        |                 | Phylum    | Class | Order | Family | Genus | Species |
|                     | Tier 2      | Tier 3 | Functional gene | Tier 2 | Tier 3 | Functional gene |           |       |       |        |       |         |
| Alpha diversity (%) | 100.0       | 99.8   | 97.2            | 99.7   | 99.6   | 99.5            | 99.0      | 99.0  | 99.0  | 98.8   | 98.2  | 95.6    |
| Beta diversity (%)  | 0.0         | 0.2    | 2.8             | 0.3    | 0.4    | 0.5             | 1.0       | 1.0   | 1.0   | 1.2    | 1.8   | 4.4     |

574

575 Diversity partitioning was calculated for both the metagenomic dataset and the 16S functional predictions. The percentage of alpha  
 576 diversity was calculated as the amount of alpha entropy divided by the amount of total entropy across all communities. The percentage  
 577 of beta diversity was calculated as 1 minus the percentage of alpha diversity.

578 **Table 2.** Occurrences of Tier 3 functions and taxa across 24 tree phyllosphere samples.

|                  | Number of combinations higher than expected by chance | % of total | Number of combinations lower than expected by chance | % of total | Total number of combinations |
|------------------|-------------------------------------------------------|------------|------------------------------------------------------|------------|------------------------------|
| <b>Functions</b> |                                                       |            |                                                      |            |                              |
| Tier 3 functions | 1553                                                  | 25         | 1570                                                 | 25         | 6192                         |
| <b>Taxa</b>      |                                                       |            |                                                      |            |                              |
| Phylum           | 495                                                   | 25         | 510                                                  | 25         | 2016                         |
| Class            | 493                                                   | 29         | 556                                                  | 33         | 1704                         |
| Order            | 1124                                                  | 29         | 1310                                                 | 34         | 3888                         |
| Family           | 2403                                                  | 27         | 2804                                                 | 32         | 8808                         |
| Genus            | 10010                                                 | 25         | 11575                                                | 29         | 40608                        |
| Species          | 47492                                                 | 20         | 45628                                                | 19         | 240288                       |

579

580 Occurrences of Tier 3 functions and taxa that are more or less abundant than would be expected by chance ( $\alpha=0.05$ ) across all

581 combinations of functions or taxa per site.

582 **Figure legends**

583 **Figure 1.** Relative abundance of the most abundant functional pathways detected across 24 tree  
584 phyllosphere samples in a neotropical forest in Panama. Functional pathways are classified using  
585 the KEGG functional hierarchy [32].

586 **Figure 2.** Principal components analysis (PCA) of microbial functional composition from the  
587 phyllosphere of neotropical trees. The 20 Tier 3 functions contributing the most to variation  
588 among samples are indicated as black arrow. Plant traits were fitted onto the PCA in a  
589 configuration that would maximize correlation with the PCA axes and are represented as blue  
590 dashed lines. Plant trait abbreviations are the following: Aluminum (AL), Calcium (CA),  
591 Carbon (C), Copper (CU), Diameter at breast height (DBH), Leaf area (LEAFAREA), Leaf dry  
592 matter content (LDMC), Leaf mass per area (LMA), Leaf thickness (LEAFTHICK), Manganese  
593 (MN), Mortality (MORT), Nitrogen (N), Phosphorus (P), Potassium (K), Relative growth rate  
594 (RGR), Zinc (ZN).

595 **Figure 3.** Distribution of microbial functions with respect to plant phylogeny. Distributions are  
596 shown for the subset of Tier 3 microbial functions with significant phylogenetic signal according  
597 to the K statistic test ( $P < 0.05$ ). Symbol size indicates the scaled relative abundance of microbial  
598 functions for each host species.

599 **Figure 4.** Log-transformed relative abundance of functions detected in the metagenomic  
600 annotations and the 16S functional predictions across 24 tree phyllosphere samples in a  
601 neotropical forest in Panama. Relative abundances were evaluated at each of 3 functional  
602 classification levels. The red line represents a 1:1 relationship between the relative abundances of  
603 functions observed at each site, such that points below the red line represent occurrences of

604 functions over-represented in the metagenomic dataset, and those above the red line occurrences

605 of functions over-represented in the 16S dataset.

606

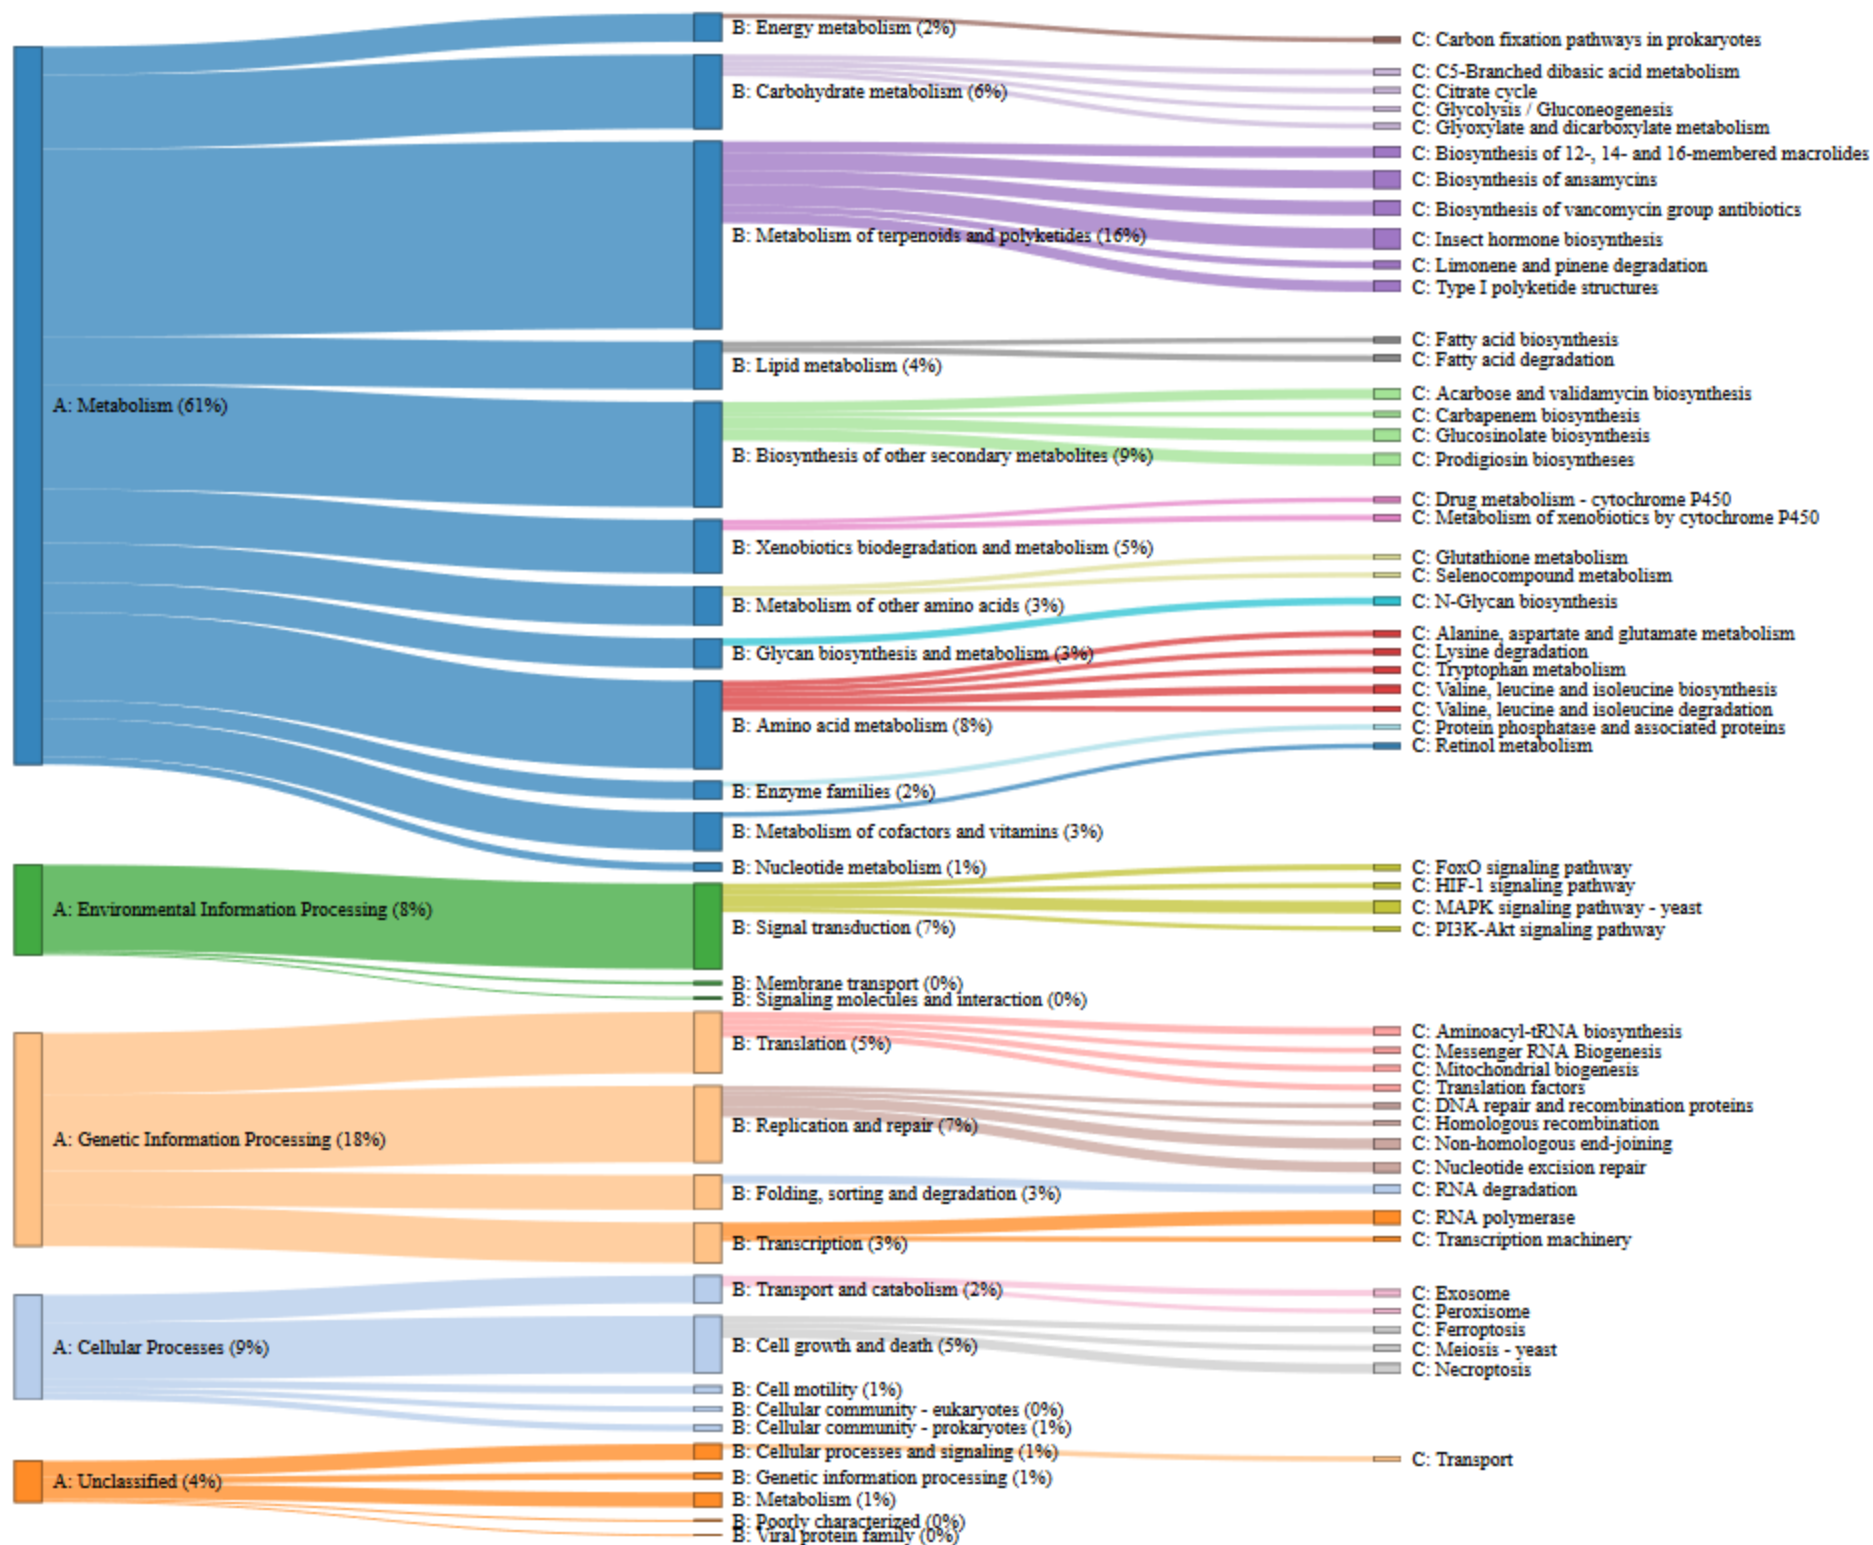



## Variables factor map (PCA)

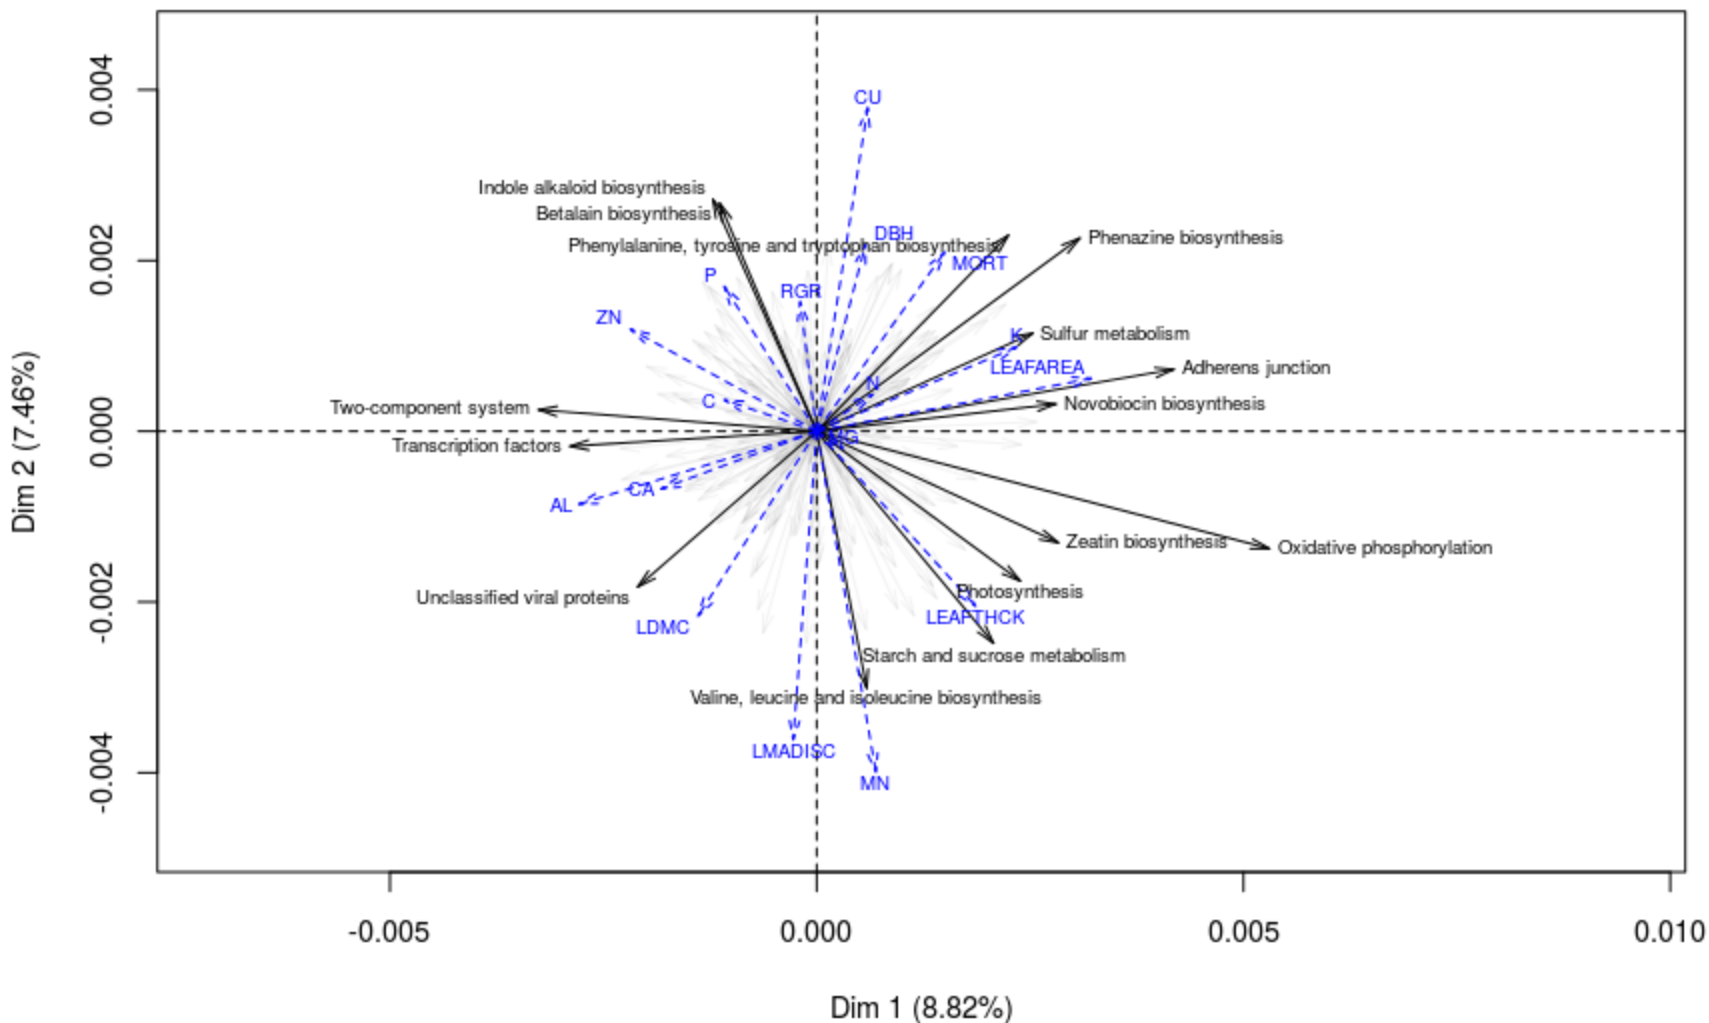

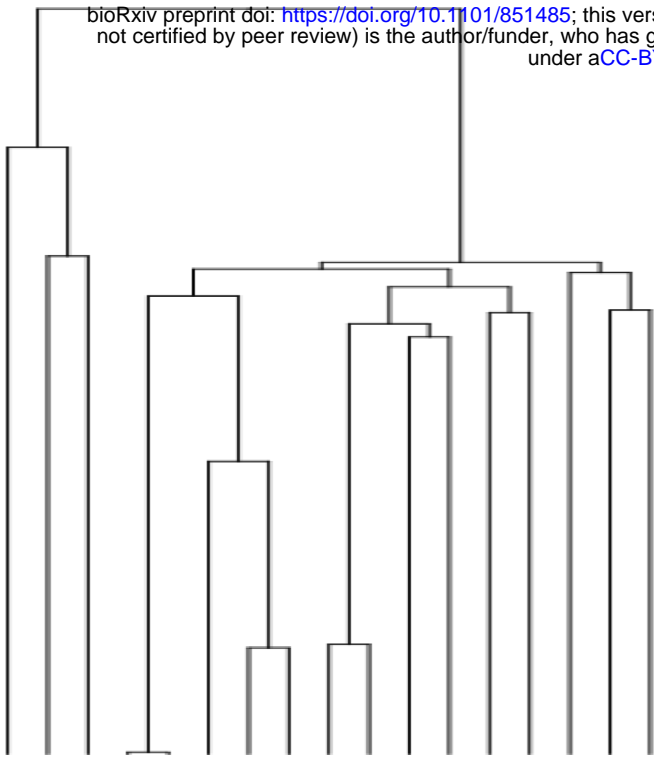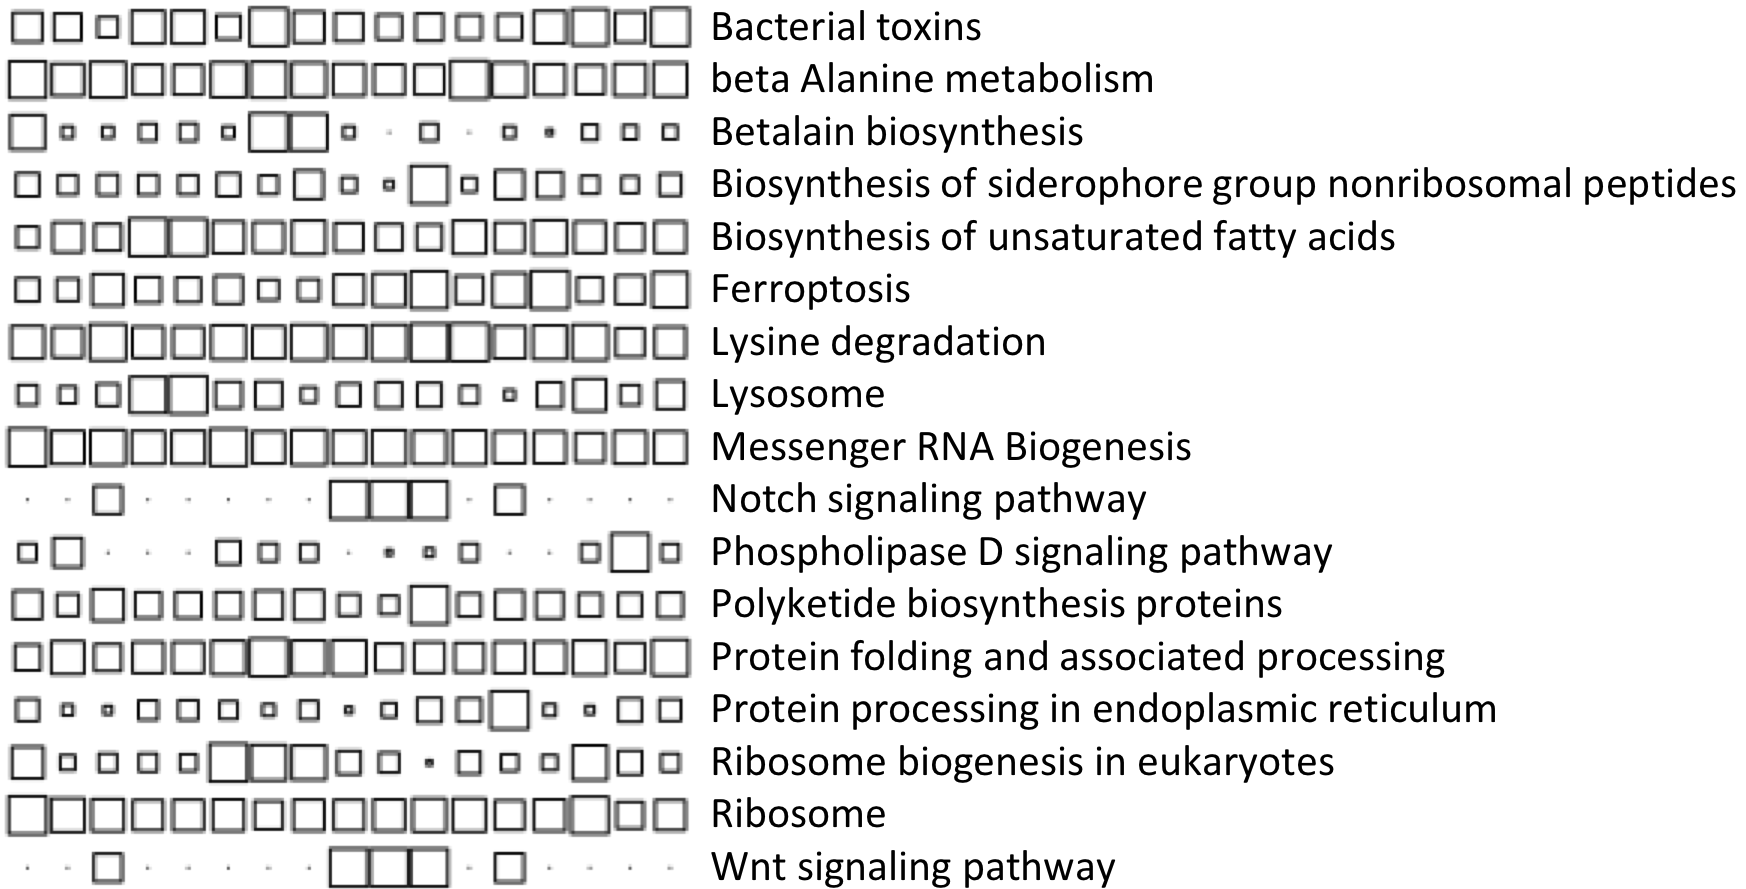

*Piper cordulatum*  
*Ocotea oblonga*  
*Desmopsis panamensis*  
*Eugenia oerstediana*  
*Eugenia nesiotica*  
*Protium tenuifolium*  
*Trichilia tuberculata*  
*Guarea guidonia*  
*Hirtella triandra*  
*Licania hypoleuca*  
*Garcinia intermedia*  
*Rinorea sylvatica*  
*Sorocea affinis*  
*Inga marginata*  
*Heisteria concinna*  
*Pouteria stipitata*  
*Faramea occidentalis*

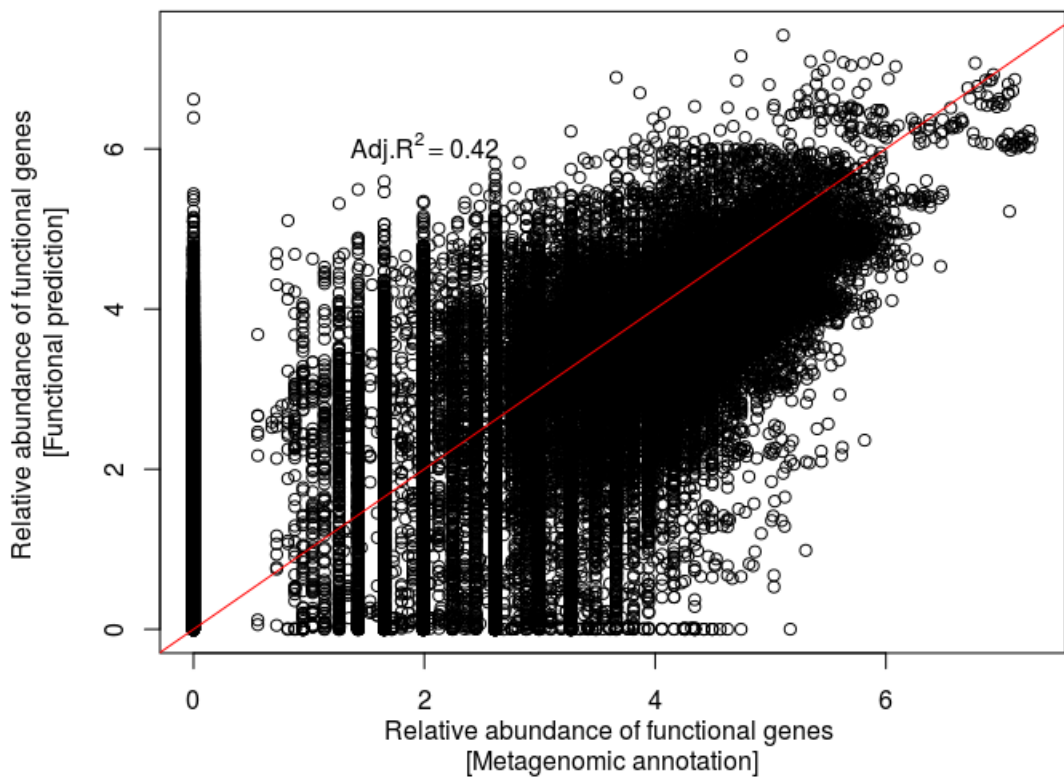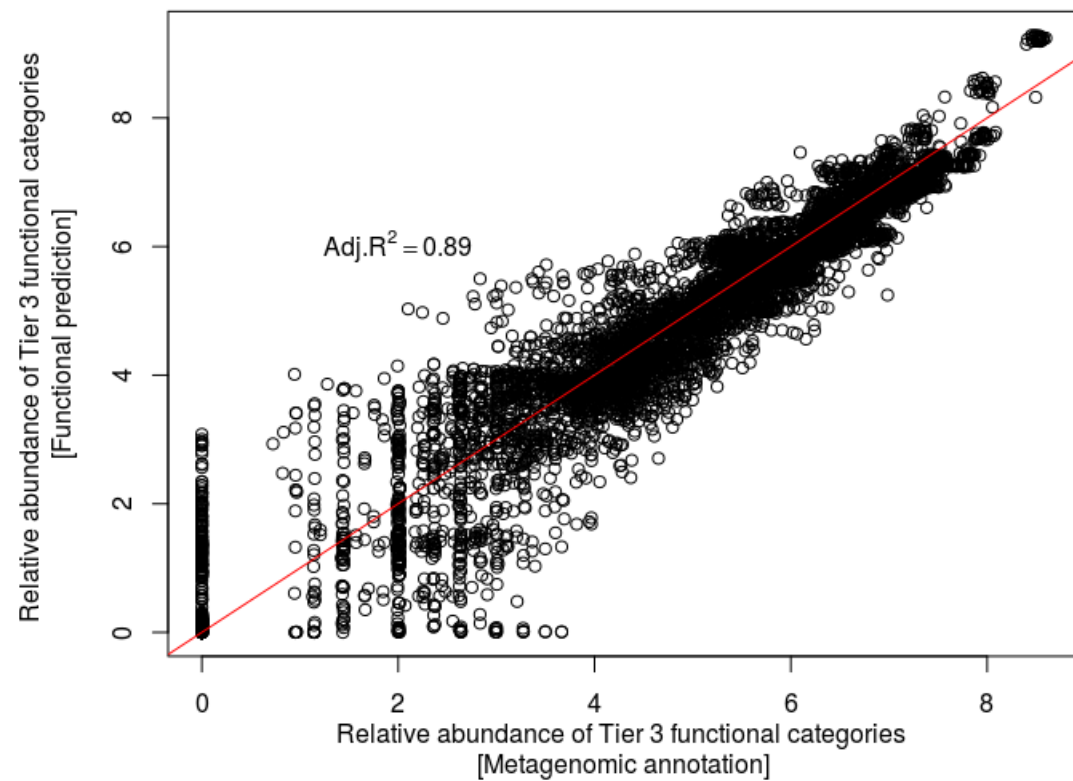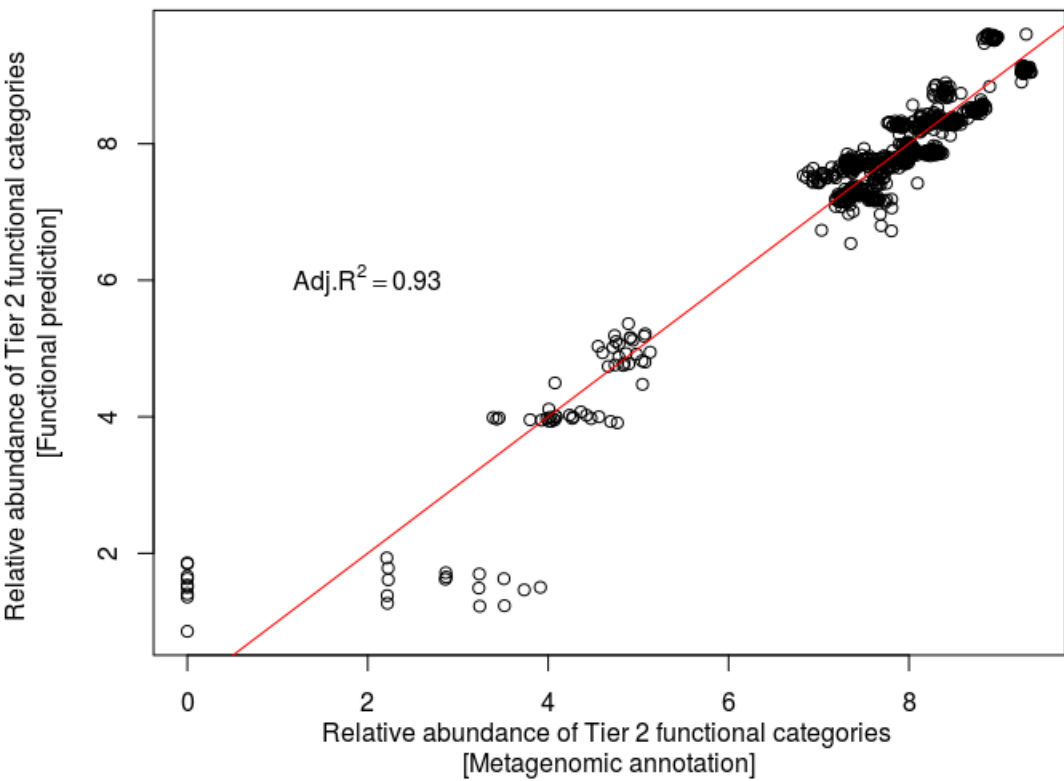

Source: https://www.biorxiv.org/content/10.1101/851485v1.full.pdf
